# Supplementary material for: The association between chronic kidney disease, falls, and fractures: a systematic review and meta-analysis
Source: Springer Nature journal article supplement (doi:10.1007/s00198-019-05190-5), 2019-11-12
Supplement: MOESM1 [file 17378104]

## **Appendix 1**

*Search performed on the 7<sup>th</sup> of September 2018.*

### **Pubmed**

("Renal Insufficiency, Chronic"[Mesh] OR Chronic kidney disease OR Chronic renal disease OR Chronic renal insufficiency OR Chronic kidney insufficiency OR End stage renal disease OR End stage kidney disease OR ESRD OR ESKD OR "Renal Dialysis"[Mesh] OR Dialysis OR Renal replacement therapy OR Kidney replacement therapy OR Hemodialysis OR "Renal Replacement Therapy"[Mesh] OR end-stage renal disease OR end-stage kidney disease)

AND

("Accidental Falls"[Mesh] OR Falls OR Falling OR fall OR fallen OR Bone fracture OR fracture OR fractures OR "Bone fracture"[Mesh] OR Vertebral fracture OR Vertebral fractures OR Spine compression fracture OR Spinal compression fracture OR Vertebral compression fracture OR Spinal fracture)

## Appendix 2; Quality assessment tool

### NEWCASTLE - OTTAWA QUALITY ASSESSMENT SCALE

#### **Selection** (Maximum 4 stars)

##### 1) Representativeness of the cases

- a) All eligible cases with outcome of interest over a defined period of time, or an appropriate sample of those cases (e.g. random sample, only men/women, specific Medicare) •
- b) any selection criteria were applied to the study population (e.g. only osteoporosis, veterans)
- ? No data on selection process

##### 2) Is the case definition adequate?

- a) Validated measurement tool, calculation of eGFR is available or described •
- b) ICD-codes, self-report
- ? No description of measurement tool/self-report

##### 3) Selection of Controls

- a) Same population/same study •
- b) Same population/different study
- ? no description

##### 4) Definition of Controls

- a) Controls with previous occurrences of outcome of interest should not be excluded for falls. For fractures in the previous year these should be excluded •
- b) Exclusion of patients that fell before or inclusion of patients with a fracture in the previous 5 years
- ? no mention of history of outcome

#### **Comparability** (Maximum 2 stars)

##### 1) Comparability of cases and controls on the basis of the design or analysis

- a) study controls for age •
- b) study controls for any additional factor •

#### **Exposure (maximum 3 stars)**

##### 1) Assessment of outcome

- a) Fall calendar or at least every 3-6 months fall interview. For fractures radiologic confirmation • •
- b) Every 6 months fall interview. For fractures ICD code/medical charts. •
- c) Only once a year interview/ self-report.
- ? no description

##### 2) Non-Response rate

- a) same rate for both groups, response rate is satisfactory (>80%)/For cohort studies complete follow-up (<5%) •
- b) non respondents described/subjects lost to follow up unlikely to introduce bias (5-15%)\*
- c) High loss to follow up (>15%)
- ? no description of non-responders/lost to FU

| <b>Appendix 3. Quality assessment accidental falling and fractures</b> |                           |                        |                              |                               |                               |                                              |                           |                                            |               |
|------------------------------------------------------------------------|---------------------------|------------------------|------------------------------|-------------------------------|-------------------------------|----------------------------------------------|---------------------------|--------------------------------------------|---------------|
|                                                                        | <b>Selection</b>          |                        |                              |                               | <b>Comparability</b>          |                                              | <b>Outcome</b>            |                                            | <b>Total</b>  |
|                                                                        | <b>Representativeness</b> | <b>Case definition</b> | <b>Selection of controls</b> | <b>Definition of controls</b> | <b>Study controls for age</b> | <b>Study controls for additional factors</b> | <b>Assessment outcome</b> | <b>Non response rate/lost to follow-up</b> | <b>Max 9.</b> |
| <b>Accidental falls</b>                                                |                           |                        |                              |                               |                               |                                              |                           |                                            |               |
| Bowling, 2016                                                          | *                         | *                      | *                            | *                             | *                             | *                                            | *                         | ?                                          | 7             |
| Chen, 2018, falls & Dukas, 2005                                        | *                         | *                      | *                            | ?                             | *                             | *                                            | **                        | ?                                          | 7             |
| Dukas, 2005 falls & Hall, 2015                                         |                           | *                      | *                            | *                             | *                             | *                                            | **                        | ?                                          | 7             |
| Kistler, 2018                                                          |                           | *                      | *                            | *                             | *                             | *                                            | *                         | *                                          | 5             |
| Naylor, 2014                                                           | *                         | *                      | *                            | ?                             | *                             | *                                            | *                         | *                                          | 7             |
| Račić, 2015                                                            | *                         | *                      | *                            | *                             |                               |                                              |                           | ?                                          | 4             |
| Rafiq, 2014                                                            | *                         |                        | *                            | *                             | *                             | *                                            | *                         | ?                                          | 6             |
| Rothenbacher, 2014                                                     | *                         | *                      | *                            | ?                             | *                             | *                                            | **                        | *                                          | 8             |
| <b>Hip/femur fractures</b>                                             |                           |                        |                              |                               |                               |                                              |                           |                                            |               |
| Alem, 2000                                                             | *                         | *                      |                              | ?                             | *                             |                                              | *                         | ?                                          | 4             |
| Arneson, 2013                                                          | *                         | *                      | *                            | ?                             | *                             | *                                            | *                         | ?                                          | 6             |
| Coco, 2000                                                             | *                         | *                      |                              | ?                             | *                             | *                                            | **                        | ?                                          | 6             |
| Dooley, 2008                                                           |                           | *                      | *                            | *                             | *                             | *                                            | *                         | ?                                          | 6             |
| Dukas 2005, fractures & Elliott, 2013                                  | *                         | *                      | *                            | ?                             | *                             | *                                            | *                         | *                                          | 6             |
| Ensrud, 2007                                                           | *                         | *                      | *                            | *                             | *                             | *                                            | **                        | *                                          | 8             |
| Ensrud, 2014                                                           | *                         | *                      | *                            |                               | *                             | *                                            | *                         | *                                          | 7             |
| Fried, 2007                                                            | *                         | *                      | *                            | *                             | *                             | *                                            | *                         | ?                                          | 7             |
| Iwagami, 2018                                                          | *                         | *                      | *                            |                               | *                             | *                                            | *                         | ?                                          | 7             |
| Kim, 2016                                                              | *                         |                        | *                            | ?                             | *                             |                                              | *                         | *                                          | 5             |
| Lacroix, 2008                                                          | *                         | *                      | *                            | *                             | *                             | *                                            | **                        | *                                          | 9             |
| Maravic, 2014                                                          | *                         | *                      | *                            | ?                             |                               |                                              | *                         | *                                          | 5             |
| Nickolas, 2006                                                         | *                         | *                      | *                            | ?                             | *                             | *                                            |                           | ?                                          | 5             |
| Pérez-Sáez, 2015                                                       | *                         |                        | *                            | ?                             | *                             | *                                            | *                         | *                                          | 6             |
| Robertson, 2018                                                        | *                         | *                      | *                            | *                             | *                             | *                                            | *                         | ?                                          | 7             |
| Wakasugi, 2013                                                         | *                         | *                      |                              | *                             | *                             | *                                            |                           | *                                          | 6             |
| <b>Vertebral fractures</b>                                             |                           |                        |                              |                               |                               |                                              |                           |                                            |               |
| Atteritano, 2017                                                       | *                         | *                      | *                            | ?                             | *                             | *                                            | **                        | ?                                          | 7             |
| Chen, 2018, fracture & Dukas 2005, fractures & Elliott, 2013           | *                         | *                      | *                            | ?                             | *                             | *                                            | **                        | *                                          | 8             |
| Ensrud, 2007                                                           | *                         | *                      | *                            | *                             | *                             | *                                            | **                        | *                                          | 8             |
| Kaji, 2010                                                             |                           | *                      | *                            | ?                             |                               | *                                            | **                        | ?                                          | 5             |
| Mishima, 2015                                                          |                           | *                      | *                            | ?                             |                               |                                              | **                        | ?                                          | 4             |
| <b>Any type of fracture</b>                                            |                           |                        |                              |                               |                               |                                              |                           |                                            |               |
| Chen, 2018, fracture & Daya, 2016                                      | *                         | *                      | *                            | ?                             | *                             | *                                            | *                         | *                                          | 7             |
| Elliott, 2013                                                          | *                         | *                      | *                            | *                             |                               |                                              | *                         | ?                                          | 5             |
| Ensrud, 2012                                                           | *                         | *                      | *                            | *                             | *                             | *                                            | *                         | ?                                          | 6             |
| Hall, 2018                                                             |                           | *                      | *                            | *                             |                               | *                                            | *                         | *                                          | 6             |
| Hansen, 2016                                                           | *                         | *                      | *                            |                               | *                             | *                                            | *                         | ?                                          | 6             |
| Kinsella, 2010                                                         |                           | *                      | *                            |                               | *                             | *                                            |                           | ?                                          | 4             |
| Kurajoh, 2018                                                          |                           | *                      | *                            | ?                             | *                             | *                                            | *                         | *                                          | 6             |
| Liao, 2016                                                             |                           | ?                      | *                            | *                             | *                             | *                                            | *                         | *                                          | 6             |
| McCarthy, 2008                                                         | *                         | *                      | *                            | ?                             | *                             | *                                            | **                        | ?                                          | 7             |

|               |   |   |   |   |   |   |   |   |          |
|---------------|---|---|---|---|---|---|---|---|----------|
| Naylor, 2014  | * | * | * |   | * | * | * | * | <b>7</b> |
| Naylor, 2015  | * | * | * |   |   |   | * | * | <b>5</b> |
| Yenchek, 2012 |   | * | * | ? | * | * | * | ? | <b>5</b> |
